# Supplementary material for: Salt-inducible kinase 3 is a novel mitotic regulator and a target for enhancing antimitotic therapeutic-mediated cell death
Source: PubMed Central journal article supplement — Cell Death Dis. 2014 Apr 17;5(4):e1177–. doi: 10.1038/cddis.2014.154 (PMC4001308; doi:10.1038/cddis.2014.154), 2014-04-17
Supplement: cddis2014154x1.pdf [file cddis2014154x1.pdf]

## Supplemental Figure S1

## List of genes targeted by the siRNA library

| Gene name | Protein name                                         | Gene ID |
|-----------|------------------------------------------------------|---------|
| Aak1      | AP2 associated kinase 1                              | 269774  |
| Abl1      | v-Abl Abelson murine leukemia oncogene 1             | 11350   |
| Abl2      | Abelson tyrosine-protein kinase 2                    | 11352   |
| Acvr1     | Activin receptor type 1                              | 11477   |
| Acvr1b    | Activin receptor type-1B                             | 11479   |
| Acvr1c    | Activin receptor type-1C                             | 269275  |
| Acvr2a    | Activin receptor IIA                                 | 11480   |
| Acvr2b    | Activin receptor IIB                                 | 11481   |
| Acvr11    | Activin receptor-like kinase 1                       | 11482   |
| Adck1     | aarF domain-containing protein kinase 1              | 72113   |
| Adck2     | aarF domain-containing protein kinase 2              | 57869   |
| Adck4     | aarF domain-containing protein kinase 4              | 76889   |
| Adck5     | aarF domain-containing protein kinase 5              | 268822  |
| Adk       | Adenosine kinase                                     | 11534   |
| Adpgk     | ADP-dependent glucokinase                            | 72141   |
| Adrbk1    | Adrenergic receptor kinase beta 1                    | 110355  |
| Adrbk2    | Beta-adrenergic receptor kinase 2                    | 320129  |
| Ak1       | Adenylate kinase 1                                   | 11636   |
| Ak2       | Adenylate kinase 2                                   | 11637   |
| Ak3       | Adenylate kinase 3                                   | 56248   |
| Ak5       | Adenylate kinase 5                                   | 229949  |
| Akt1      | Thymoma viral proto-oncogene 1                       | 11651   |
| Akt2      | Thymoma viral proto-oncogene 2                       | 11652   |
| Akt3      | Thymoma viral proto-oncogene 3                       | 23797   |
| Aldh18a1  | Aldehyde dehydrogenase 18 family member A1           | 56454   |
| Alk       | Anaplastic lymphoma kinase                           | 11682   |
| Alpk2     | Alpha-kinase 2                                       | 225638  |
| Alpk3     | Alpha-kinase 3                                       | 116904  |
| Amhr2     | Anti-Mullerian hormone type 2 receptor               | 110542  |
| Ankk1     | Ankyrin repeat and kinase domain containing 1        | 244859  |
| Araf      | v-Raf murine sarcoma 3611 viral oncogene homolog     | 11836   |
| Atm       | Ataxia telangiectasia mutated                        | 11920   |
| Aurka     | Aurora kinase A                                      | 20878   |
| Aurkb     | Aurora kinase B                                      | 20877   |
| Axl       | AXL receptor tyrosine kinase                         | 26362   |
| Bckdk     | Branched chain ketoacid dehydrogenase kinase         | 12041   |
| Bcr       | Breakpoint cluster region homolog                    | 110279  |
| Blk       | B lymphoid kinase                                    | 12143   |
| Bmp2k     | BMP2 inducible kinase                                | 140780  |
| Bmpr1a    | Bone morphogenetic protein receptor type 1A          | 12166   |
| Bmpr1b    | Bone morphogenetic protein receptor type-1B          | 12167   |
| Bmpr2     | Bone morphogenetic protein receptor type-2           | 12168   |
| Bmx       | BMX non-receptor tyrosine kinase                     | 12169   |
| Brd2      | Bromodomain-containing protein 2                     | 14312   |
| Brd3      | Bromodomain-containing protein 3                     | 67382   |
| Brd4      | Bromodomain-containing protein 4                     | 57261   |
| Brdt      | Bromodomain testis-specific protein                  | 114642  |
| Brsk1     | BR serine/threonine kinase 1                         | 381979  |
| Brsk2     | BR serine/threonine kinase 2                         | 75770   |
| Btk       | Bruton agammaglobulinemia tyrosine kinase            | 12229   |
| Bub1      | Budding uninhibited by benzimidazoles 1 homolog      | 12235   |
| Bub1b     | Budding uninhibited by benzimidazoles 1 homolog beta | 12236   |
| Cabc1     | Chaperone, ABC1 activity of bc1 complex like         | 67426   |
| Calm1     | Calmodulin 1                                         | 12313   |
| Camk1     | Calcium/calmodulin-dependent protein kinase I        | 52163   |
| Camk1d    | Calcium/calmodulin-dependent protein kinase type 1D  | 227541  |

|          |                                                           |        |
|----------|-----------------------------------------------------------|--------|
| Camk1g   | Calcium/calmodulin-dependent protein kinase I gamma       | 215303 |
| Camk2a   | Calcium/calmodulin-dependent protein kinase type II alpha | 12322  |
| Camk2b   | Calcium/calmodulin-dependent protein kinase type II beta  | 12323  |
| Camk2d   | Calcium/calmodulin-dependent protein kinase II delta      | 108058 |
| Camk2g   | Calcium/calmodulin-dependent protein kinase II gamma      | 12325  |
| Camk4    | Calcium/calmodulin-dependent protein kinase IV            | 12326  |
| Camkk1   | Calcium/calmodulin-dependent protein kinase kinase 1      | 55984  |
| Camkv    | CaM kinase-like vesicle-associated                        | 235604 |
| Cask     | Calcium/calmodulin-dependent serine protein kinase        | 12361  |
| Ccl12    | Chemokine (C-C motif) ligand 12                           | 20293  |
| Ccnb1    | Cyclin B1                                                 | 268697 |
| Ccnd1    | Cyclin D1                                                 | 12443  |
| Ccne1    | Cyclin E1                                                 | 12447  |
| Cdc20    | Cyclin-dependent kinase 20                                | 105278 |
| Cdc42bpb | Cdc42 binding protein kinase beta                         | 217866 |
| Cdc42bpg | Cdc42 binding protein kinase gamma                        | 240505 |
| Cdc7     | Cell division cycle 7                                     | 12545  |
| Cdk1     | Cyclin-dependent kinase 1                                 | 12534  |
| Cdk10    | Cyclin-dependent kinase 10                                | 234854 |
| Cdk12    | Cyclin-dependent kinase 12                                | 69131  |
| Cdk13    | Cyclin-dependent kinase 13                                | 69562  |
| Cdk15    | Cyclin-dependent kinase 15                                | 271697 |
| Cdk19    | Cyclin-dependent kinase 19                                | 78334  |
| Cdk2     | Cyclin-dependent kinase 2                                 | 12566  |
| Cdk4     | Cyclin-dependent kinase 4                                 | 12567  |
| Cdk5     | Cyclin-dependent kinase 5                                 | 12568  |
| Cdk6     | Cyclin-dependent kinase 6                                 | 12571  |
| Cdk7     | Cyclin-dependent kinase 7                                 | 12572  |
| Cdk9     | Cyclin-dependent kinase 9                                 | 107951 |
| Cdkl1    | Cyclin-dependent kinase-like 1                            | 71091  |
| Cdkl2    | Cyclin-dependent kinase-like 2                            | 53886  |
| Cdkl4    | Cyclin-dependent kinase-like 4                            | 381113 |
| Cerk     | Ceramide kinase                                           | 223753 |
| Chek1    | Checkpoint kinase 1                                       | 12649  |
| Chek2    | Checkpoint kinase 2                                       | 50883  |
| Chka     | Choline kinase alpha                                      | 12660  |
| Chuk     | Conserved helix-loop-helix ubiquitous kinase              | 12675  |
| Cit      | Citron kinase                                             | 12704  |
| Ckm      | Creatine kinase, muscle                                   | 12715  |
| Ckmt1    | Creatine kinase, mitochondrial 1, ubiquitous              | 12716  |
| Ckmt2    | Creatine kinase, mitochondrial 2                          | 76722  |
| Clk2     | CDC-like kinase 2                                         | 12748  |
| Clk3     | CDC-like kinase 3                                         | 102414 |
| Clk4     | CDC-like kinase 4                                         | 12750  |
| Cmpk     | Cytidylate kinase                                         | 66588  |
| Coasy    | Coenzyme A synthase                                       | 71743  |
| Col4a3bp | Collagen type IV alpha-3-binding protein                  | 68018  |
| Crkl     | Crk-like protein                                          | 12929  |
| Csf1r    | Colony stimulating factor 1 receptor                      | 12978  |
| Csk      | c-Src tyrosine kinase                                     | 12988  |
| Csnk1a1  | Casein kinase 1 alpha 1                                   | 93687  |
| Csnk1d   | Casein kinase 1 delta                                     | 104318 |
| Csnk1e   | Casein kinase 1 epsilon                                   | 27373  |
| Csnk1g1  | Casein kinase 1 gamma-1                                   | 214897 |
| Csnk1g2  | Casein kinase 1 gamma 2                                   | 103236 |
| Csnk2a1  | Casein kinase II subunit alpha                            | 12995  |
| Csnk2a2  | Casein kinase II alpha'                                   | 13000  |
| Csnk2b   | Casein kinase II beta                                     | 13001  |
| Dapk1    | Death associated protein kinase 1                         | 69635  |
| Dapk2    | Death-associated kinase 2                                 | 13143  |

|         |                                                               |        |
|---------|---------------------------------------------------------------|--------|
| Dapk3   | Death-associated kinase 3                                     | 13144  |
| Dcamk1  | Doublecortin and CaM kinase-like 1                            | 13175  |
| Dcamk2  | Doublecortin and CaM kinase-like 2                            | 70762  |
| Dcamk3  | Doublecortin and CaM kinase-like 3                            | 245038 |
| Dck     | Deoxycytidine kinase                                          | 13178  |
| Ddr1    | Discoidin domain receptor family member 1                     | 12305  |
| Ddr2    | Discoidin domain receptor family member 2                     | 18214  |
| Dgka    | Diacylglycerol kinase alpha                                   | 13139  |
| Dgkb    | Diacylglycerol kinase beta                                    | 217480 |
| Dgkd    | Diacylglycerol kinase delta                                   | 227333 |
| Dgke    | Diacylglycerol kinase epsilon                                 | 56077  |
| Dgkg    | Diacylglycerol kinase gamma                                   | 110197 |
| Dgkh    | Diacylglycerol kinase eta                                     | 380921 |
| Dgki    | Diacylglycerol kinase iota                                    | 320127 |
| Dgkq    | Diacylglycerol kinase theta                                   | 110524 |
| Dgkz    | Diacylglycerol kinase zeta                                    | 104418 |
| Dguok   | Deoxyguanosine kinase                                         | 27369  |
| Dlgh1   | Discs large homolog 1                                         | 13383  |
| Dlgh2   | Discs large homolog 2                                         | 23859  |
| Dlgh3   | Discs large homolog 3                                         | 53310  |
| Dlgh4   | Discs large homolog 4                                         | 13385  |
| Dmpk    | Myotonin-protein kinase                                       | 13400  |
| Dyrk1a  | Dual specificity tyrosine-phosphorylation-regulated kinase 1a | 13548  |
| Dyrk1b  | Dual specificity tyrosine-phosphorylation-regulated kinase 1b | 13549  |
| Dyrk2   | Dual specificity tyrosine-phosphorylation-regulated kinase 2  | 69181  |
| Dyrk3   | Dual specificity tyrosine-phosphorylation-regulated kinase 3  | 226419 |
| Dyrk4   | Dual specificity tyrosine-phosphorylation-regulated kinase 4  | 101320 |
| Eef2k   | Eukaryotic elongation factor-2 kinase                         | 13631  |
| Egfr    | Epidermal growth factor receptor                              | 13649  |
| Eif2ak1 | Eukaryotic translation initiation factor 2 alpha kinase 1     | 15467  |
| Eif2ak2 | Eukaryotic translation initiation factor 2 alpha kinase 2     | 19106  |
| Eif2ak3 | Eukaryotic translation initiation factor 2 alpha kinase 3     | 13666  |
| Epha1   | Eph receptor A1                                               | 13835  |
| Epha10  | Eph receptor A10                                              | 230735 |
| Epha2   | Eph receptor A2                                               | 13836  |
| Epha3   | Eph receptor A3                                               | 13837  |
| Epha4   | Eph receptor A4                                               | 13838  |
| Epha7   | Eph receptor A7                                               | 13841  |
| Epha8   | Eph receptor A8                                               | 13842  |
| Ephb1   | Eph receptor B1                                               | 270190 |
| Ephb2   | Eph receptor B2                                               | 13844  |
| Ephb3   | Eph receptor B3                                               | 13845  |
| Ephb4   | Eph receptor B4                                               | 13846  |
| Ephb6   | Eph receptor B6                                               | 13848  |
| ErbB2   | Receptor tyrosine-protein kinase ErbB-2                       | 13866  |
| ErbB3   | Receptor tyrosine-protein kinase ErbB-3                       | 13867  |
| ErbB4   | Receptor tyrosine-protein kinase ErbB-4                       | 13869  |
| Ern1    | Endoplasmic reticulum to nucleus signalling 1                 | 78943  |
| Etnk1   | Ethanolamine kinase 1                                         | 75320  |
| Etnk2   | Ethanolamine kinase 2                                         | 214253 |
| Exosc10 | Exosome component 10                                          | 50912  |
| Fer     | Tyrosine-protein kinase Fer                                   | 14158  |
| Fes     | Feline sarcoma oncogene                                       | 14159  |
| Fgfr2   | Fibroblast growth factor receptor 2                           | 14183  |
| Fgfr3   | Fibroblast growth factor receptor 3                           | 14184  |
| Fgfr4   | Fibroblast growth factor receptor 4                           | 14186  |
| Fgfr1   | Fibroblast growth factor receptor-like 1                      | 116701 |
| Fgr     | Tyrosine-protein kinase Fgr                                   | 14191  |
| Flt1    | FMS-like tyrosine kinase 1                                    | 14254  |
| Flt3    | FMS-like tyrosine kinase 3                                    | 14255  |

|        |                                                         |        |
|--------|---------------------------------------------------------|--------|
| Flt4   | FMS-like tyrosine kinase 4                              | 14257  |
| Fn3k   | Fructosamine 3 kinase                                   | 63828  |
| Frap1  | FK506 binding protein 12-rapamycin associated protein 1 | 56717  |
| Frk    | Tyrosine-protein kinase Frk                             | 14302  |
| Fuk    | Fucokinase                                              | 234730 |
| Fxn    | Frataxin                                                | 14297  |
| Fyn    | Tyrosine-protein kinase Fyn                             | 14360  |
| Gak    | Cyclin G-associated kinase                              | 231580 |
| Galk1  | Galactokinase 1                                         | 14635  |
| Galk2  | Galactokinase 2                                         | 69976  |
| Gck    | Glucokinase                                             | 103988 |
| Gk2    | Glycerol kinase 2                                       | 14626  |
| Gm1078 | Protein Gm1078                                          | 381835 |
| Gne    | Glucosamine                                             | 50798  |
| Grk1   | G protein-coupled receptor kinase 1                     | 24013  |
| Grk4   | G protein-coupled receptor kinase 4                     | 14772  |
| Grk5   | G protein-coupled receptor kinase 5                     | 14773  |
| Gsg2   | Germ cell-specific gene 2                               | 14841  |
| Gsk3a  | Glycogen synthase kinase 3 alpha                        | 606496 |
| Gsk3b  | Glycogen synthase kinase 3 beta                         | 56637  |
| Gucy2c | Guanylate cyclase 2c                                    | 14917  |
| Gucy2e | Guanylate cyclase 2e                                    | 14919  |
| Gucy2f | Guanylate cyclase 2f                                    | 245650 |
| Gyk    | Glycerol kinase                                         | 14933  |
| Hck    | Hemopoietic cell kinase                                 | 15162  |
| Hipk1  | Homeodomain interacting protein kinase 1                | 15257  |
| Hipk3  | Homeodomain interacting protein kinase 3                | 15259  |
| Hipk4  | Homeodomain interacting protein kinase 4                | 233020 |
| Hk1    | Hexokinase 1                                            | 15275  |
| Hk2    | Hexokinase 2                                            | 15277  |
| Hspb8  | Heat shock protein beta-8                               | 80888  |
| Hunk   | Hormonally upregulated Neu-associated kinase            | 26559  |
| Ick    | Intestinal cell kinase                                  | 56542  |
| Igf1r  | Insulin-like growth factor 1 receptor                   | 16001  |
| Igf2r  | Insulin-like growth factor 2 receptor                   | 16004  |
| Ihpk1  | Inositol hexaphosphate kinase 1                         | 27399  |
| Ikbkb  | Inhibitor of kappaB kinase beta                         | 16150  |
| Ikbke  | Inhibitor of kappaB kinase epsilon                      | 56489  |
| Ilk    | Integrin linked kinase                                  | 16202  |
| Insr   | Insulin receptor                                        | 16337  |
| Insr   | Insulin receptor-related receptor                       | 23920  |
| Ip6k3  | Inositol hexakisphosphate kinase 3                      | 271424 |
| Ipmk   | Inositol polyphosphate multikinase                      | 69718  |
| Irak1  | Interleukin-1 receptor-associated kinase 1              | 16179  |
| Irak2  | Interleukin-1 receptor-associated kinase 2              | 108960 |
| Irak3  | Interleukin-1 receptor-associated kinase 3              | 73914  |
| Irak4  | Interleukin-1 receptor-associated kinase 4              | 266632 |
| Itk    | IL2-inducible T-cell kinase                             | 16428  |
| Itpk1  | Inositol 1,3,4-triphosphate 5/6 kinase                  | 217837 |
| Itpka  | Inositol 1,4,5-trisphosphate 3-kinase A                 | 228550 |
| Itpkb  | Inositol 1,4,5-trisphosphate 3-kinase B                 | 320404 |
| Itpkc  | Inositol 1,4,5-trisphosphate 3-kinase C                 | 233011 |
| Jak1   | Janus kinase 1                                          | 16451  |
| Jak2   | Janus kinase 2                                          | 16452  |
| Jak3   | Janus kinase 3                                          | 16453  |
| Kdr    | Kinase insert domain protein receptor                   | 16542  |
| Khk    | Ketohexokinase                                          | 16548  |
| Kit    | Kit oncogene                                            | 16590  |
| Ksr1   | Kinase suppressor of ras 1                              | 16706  |
| Ksr2   | Kinase suppressor of Ras 2                              | 333050 |

|           |                                                            |        |
|-----------|------------------------------------------------------------|--------|
| Lats2     | Large tumor suppressor 2                                   | 50523  |
| Lck       | Lymphocyte protein tyrosine kinase                         | 16818  |
| Limk1     | LIM-domain kinase 1                                        | 16885  |
| Limk2     | LIM-domain kinase 2                                        | 16886  |
| Lmtk2     | Lemur tyrosine kinase 2                                    | 231876 |
| Lmtk3     | Lemur tyrosine kinase 3                                    | 381983 |
| LOC621325 | Similar to Yeast Sps1/Ste20-related kinase 4 isoform 1     | 621325 |
| LOC624990 | Similar to WNK lysine deficient protein kinase 3 isoform 1 | 624990 |
| Lrrk2     | Leucine-rich repeat kinase 2                               | 66725  |
| Ltk       | Leukocyte tyrosine kinase                                  | 17005  |
| Lyn       | Tyrosine-protein kinase Lyn                                | 17096  |
| Magj3     | Membrane-associated guanylate kinase 3                     | 99470  |
| Mak       | Male germ cell-associated kinase                           | 17152  |
| Map2k1    | Mitogen activated protein kinase kinase 1                  | 26395  |
| Map2k2    | Mitogen activated protein kinase kinase 2                  | 26396  |
| Map2k3    | Mitogen activated protein kinase kinase 3                  | 26397  |
| Map2k4    | Mitogen activated protein kinase kinase 4                  | 26398  |
| Map2k5    | Mitogen activated protein kinase kinase 5                  | 23938  |
| Map2k6    | Mitogen activated protein kinase kinase 6                  | 26399  |
| Map2k7    | Mitogen activated protein kinase kinase 7                  | 26400  |
| Map3k1    | Mitogen activated protein kinase kinase kinase 1           | 26401  |
| Map3k10   | Mitogen activated protein kinase kinase kinase 10          | 269881 |
| Map3k11   | Mitogen-activated protein kinase kinase kinase 11          | 26403  |
| Map3k12   | Mitogen activated protein kinase kinase kinase 12          | 26404  |
| Map3k13   | Mitogen-activated protein kinase kinase kinase 13          | 71751  |
| Map3k14   | Mitogen-activated protein kinase kinase kinase 14          | 53859  |
| Map3k2    | Mitogen activated protein kinase kinase kinase 2           | 26405  |
| Map3k3    | Mitogen activated protein kinase kinase kinase 3           | 26406  |
| Map3k4    | Mitogen activated protein kinase kinase kinase 4           | 26407  |
| Map3k5    | Mitogen activated protein kinase kinase kinase 5           | 26408  |
| Map3k6    | Mitogen-activated protein kinase kinase kinase 6           | 53608  |
| Map3k7    | Mitogen-activated protein kinase kinase kinase 7           | 26409  |
| Map3k8    | Mitogen activated protein kinase kinase kinase 8           | 26410  |
| Map3k9    | Mitogen-activated protein kinase kinase kinase 9           | 338372 |
| Map4k1    | Mitogen activated protein kinase kinase kinase kinase 1    | 26411  |
| Map4k2    | Mitogen activated protein kinase kinase kinase kinase 2    | 26412  |
| Map4k3    | Mitogen-activated protein kinase kinase kinase kinase 3    | 225028 |
| Map4k4    | Mitogen-activated protein kinase kinase kinase kinase 4    | 26921  |
| Map4k5    | Mitogen-activated protein kinase kinase kinase kinase 5    | 399510 |
| Mapk1     | Mitogen activated protein kinase 1                         | 26413  |
| Mapk10    | Mitogen activated protein kinase 10                        | 26414  |
| Mapk11    | Mitogen-activated protein kinase 11                        | 19094  |
| Mapk12    | Mitogen-activated protein kinase 12                        | 29857  |
| Mapk13    | Mitogen activated protein kinase 13                        | 26415  |
| Mapk14    | Mitogen activated protein kinase 14                        | 26416  |
| Mapk3     | Mitogen activated protein kinase 3                         | 26417  |
| Mapk4     | Mitogen-activated protein kinase 4                         | 225724 |
| Mapk6     | Mitogen-activated protein kinase 6                         | 50772  |
| Mapk7     | Mitogen activated protein kinase 7                         | 23939  |
| Mapk8     | Mitogen activated protein kinase 8                         | 26419  |
| Mapk9     | Mitogen activated protein kinase 9                         | 26420  |
| Mapkapk2  | MAP kinase-activated protein kinase 2                      | 17164  |
| Mapkapk3  | MAP kinase-activated protein kinase 3                      | 102626 |
| Mapkapk5  | MAP kinase-activated protein kinase 5                      | 17165  |
| Mark1     | MAP/microtubule affinity-regulating kinase 1               | 226778 |
| Mark2     | MAP/microtubule affinity-regulating kinase 2               | 13728  |
| Mark3     | MAP/microtubule affinity-regulating kinase 3               | 17169  |
| Mark4     | MAP/microtubule affinity-regulating kinase 4               | 232944 |
| Mast1     | Microtubule associated serine/threonine kinase 1           | 56527  |
| Mast2     | Microtubule associated serine/threonine kinase 2           | 17776  |

|       |                                                                             |        |
|-------|-----------------------------------------------------------------------------|--------|
| Mast4 | Microtubule associated serine/threonine kinase 4                            | 328329 |
| Mastl | Microtubule associated serine/threonine kinase-like                         | 67121  |
| Matk  | Megakaryocyte-associated tyrosine kinase                                    | 17179  |
| Melk  | Maternal embryonic leucine zipper kinase                                    | 17279  |
| Mertk | Tyrosine-protein kinase Mer                                                 | 17289  |
| Met   | Met protein                                                                 | 17295  |
| Mknk1 | MAP kinase-interacting serine/threonine kinase 1                            | 17346  |
| Mknk2 | MAP kinase-interacting serine/threonine kinase 2                            | 17347  |
| MLk4  | Mitogen-activated protein kinase kinase kinase Mlk4                         | 234878 |
| Mltk  | Mitogen-activated protein kinase kinase kinase Mlt                          | 65964  |
| Mos   | Moloney sarcoma oncogene                                                    | 17451  |
| Mpp1  | Membrane protein, palmitoylated                                             | 17524  |
| Mpp2  | MAGUK p55 subfamily member 2                                                | 50997  |
| Mpp3  | MAGUK p55 subfamily member 3                                                | 13384  |
| Mst1r | Macrophage stimulating 1 receptor (c-met-related tyrosine kinase)           | 19882  |
| Mst4  | Serine/threonine-protein kinase MST4                                        | 70415  |
| Mulk  | Multiple substrate lipid kinase                                             | 69923  |
| Musk  | Muscle, skeletal, receptor tyrosine kinase                                  | 18198  |
| Mvk   | Mevalonate kinase                                                           | 17855  |
| Mylk  | Myosin light chain kinase                                                   | 107589 |
| Mylk2 | Myosin light chain kinase 2, skeletal/cardiac muscle                        | 228785 |
| Mylk3 | Myosin light chain kinase 3                                                 | 213435 |
| Mylk4 | Myosin light chain kinase family member 4                                   | 238564 |
| Myo3b | Myosin IIIB                                                                 | 269282 |
| Myt1  | Membrane-associated tyrosine- and threonine-specific cdc2-inhibitory kinase | 268930 |
| Nadk  | NAD kinase                                                                  | 192185 |
| Nagk  | N-acetylglucosamine kinase                                                  | 56174  |
| Nags  | N-acetylglutamate synthase                                                  | 217214 |
| Nek1  | NIMA-related protein kinase 1                                               | 18004  |
| Nek11 | NIMA-related protein kinase 11                                              | 208583 |
| Nek3  | NIMA-related protein kinase 3                                               | 23954  |
| Nek4  | NIMA-related protein kinase 4                                               | 23955  |
| Nek5  | NIMA-related protein kinase 5                                               | 330721 |
| Nek6  | NIMA-related protein kinase 6                                               | 59126  |
| Nek7  | NIMA-related protein kinase 7                                               | 59125  |
| Nek8  | NIMA-related protein kinase 8                                               | 140859 |
| Nek9  | NIMA-related protein kinase 9                                               | 217718 |
| Nim1  | Serine/threonine-protein kinase Nim1                                        | 245269 |
| Nlk   | Nemo-like kinase                                                            | 18099  |
| Nme5  | Expressed in non-metastatic cells 5                                         | 75533  |
| Nme6  | Expressed in non-metastatic cells 6                                         | 54369  |
| Nme7  | Non-metastatic cells 7                                                      | 171567 |
| Npr1  | Natriuretic peptide receptor 1                                              | 18160  |
| Npr2  | Natriuretic peptide receptor 2                                              | 230103 |
| Nrbp  | Nuclear receptor binding protein                                            | 192292 |
| Nrbp2 | Nuclear receptor binding protein 2                                          | 223649 |
| Nrk   | Nik-related protein kinase                                                  | 27206  |
| Ntrk1 | Neurotrophic tyrosine kinase receptor type 1                                | 18211  |
| Ntrk2 | Neurotrophic tyrosine kinase receptor type 2                                | 18212  |
| Ntrk3 | Neurotrophic tyrosine kinase receptor type 3                                | 18213  |
| Nuak1 | NUAK family SNF1-like kinase 1                                              | 77976  |
| Nuak2 | NUAK family SNF1-like kinase 2                                              | 74137  |
| Oxsr1 | Oxidative-stress responsive 1                                               | 108737 |
| Pak1  | p21 (CDKN1A)-activated kinase 1                                             | 18479  |
| Pak2  | p21 (CDKN1A)-activated kinase 2                                             | 224105 |
| Pak3  | p21 (CDKN1A)-activated kinase 3                                             | 18481  |
| Pak4  | p21 (CDKN1A)-activated kinase 4                                             | 70584  |
| Pak6  | p21 (CDKN1A)-activated kinase 6                                             | 214230 |
| Pak7  | p21 (CDKN1A)-activated kinase 7                                             | 241656 |
| Pank1 | Pantothenate kinase 1                                                       | 75735  |

|         |                                                                              |        |
|---------|------------------------------------------------------------------------------|--------|
| Pank2   | Pantothenate kinase 2                                                        | 74450  |
| Pank3   | Pantothenate kinase 3                                                        | 211347 |
| Pank4   | Pantothenate kinase 4                                                        | 269614 |
| Pask    | PAS domain containing serine/threonine kinase                                | 269224 |
| Pbk     | PDZ-binding kinase                                                           | 52033  |
| Pctk1   | PCTAIRE-motif protein kinase 1                                               | 18555  |
| Pctk2   | PCTAIRE-motif protein kinase 2                                               | 237459 |
| Pctk3   | PCTAIRE-motif protein kinase 3                                               | 18557  |
| Pdgfra  | Platelet-derived growth factor receptor alpha                                | 18595  |
| Pdgfrb  | Platelet-derived growth factor receptor beta                                 | 18596  |
| Pdgfrl  | Platelet-derived growth factor receptor-like                                 | 68797  |
| Pdik1l  | PDLIM1-interacting kinase 1 like                                             | 230809 |
| Pdk1    | Pyruvate dehydrogenase kinase isoenzyme 1                                    | 228026 |
| Pdk2    | Pyruvate dehydrogenase kinase isoenzyme 2                                    | 18604  |
| Pdk3    | Pyruvate dehydrogenase kinase isoenzyme 3                                    | 236900 |
| Pdk4    | Pyruvate dehydrogenase kinase isoenzyme 4                                    | 27273  |
| Pdpk1   | 3-phosphoinositide dependent protein kinase-1                                | 18607  |
| Pdxk    | Pyridoxal kinase                                                             | 216134 |
| Peak1   | Pseudopodium-enriched atypical kinase 1                                      | 244895 |
| Pfkb1   | 6-phosphofructo-2-kinase/fructose-2,6-biphosphatase 1                        | 18639  |
| Pfkb2   | 6-phosphofructo-2-kinase/fructose-2,6-biphosphatase 2                        | 18640  |
| Pfkb3   | 6-phosphofructo-2-kinase/fructose-2,6-biphosphatase 3                        | 170768 |
| Pfkb4   | 6-phosphofructo-2-kinase/fructose-2,6-biphosphatase 4                        | 270198 |
| Pfkl    | Phosphofructokinase, liver                                                   | 18641  |
| Pfkm    | Phosphofructokinase, muscle                                                  | 18642  |
| Pfkp    | Phosphofructokinase, platelet                                                | 56421  |
| Pftk1   | PFTAIRE protein kinase 1                                                     | 18647  |
| Pgk2    | Phosphoglycerate kinase 2                                                    | 18663  |
| Phka1   | Phosphorylase kinase alpha 1                                                 | 18679  |
| Phka2   | Phosphorylase kinase alpha 2                                                 | 110094 |
| Phkb    | Phosphorylase kinase beta                                                    | 102093 |
| Phkg1   | Phosphorylase kinase gamma 1                                                 | 18682  |
| Phkg2   | Phosphorylase b kinase gamma catalytic chain, liver/testis isoform           | 68961  |
| Pi4k2a  | Phosphatidylinositol 4-kinase type 2 alpha                                   | 84095  |
| Pi4k2b  | Phosphatidylinositol 4-kinase type 2 beta                                    | 67073  |
| Pik3c2a | Phosphatidylinositol 4-phosphate 3-kinase C2 domain-containing subunit alpha | 18704  |
| Pik3c2b | Protein Pik3c2b                                                              | 240752 |
| Pik3c2g | Phosphatidylinositol 4-phosphate 3-kinase C2 domain-containing subunit gamma | 18705  |
| Pik3c3  | Phosphatidylinositol 3-kinase catalytic subunit type 3                       | 225326 |
| Pik3ca  | Phosphatidylinositol 4,5-bisphosphate 3-kinase catalytic subunit alpha       | 18706  |
| Pik3cb  | Phosphatidylinositol 4,5-bisphosphate 3-kinase catalytic subunit beta        | 74769  |
| Pik3cd  | Phosphatidylinositol 4,5-bisphosphate 3-kinase catalytic subunit delta       | 18707  |
| Pik3cg  | Phosphatidylinositol 4,5-bisphosphate 3-kinase catalytic subunit gamma       | 30955  |
| Pik3r4  | Phosphoinositide 3-kinase regulatory subunit 4                               | 75669  |
| Pik4ca  | Phosphatidylinositol 4-kinase, catalytic, alpha polypeptide                  | 224020 |
| Pik4cb  | Phosphatidylinositol 4-kinase beta                                           | 107650 |
| Pim1    | Proviral integration site 1                                                  | 18712  |
| Pim3    | Proviral integration site 3                                                  | 223775 |
| Pink1   | PTEN induced putative kinase 1                                               | 68943  |
| Pip5k1b | Phosphatidylinositol 4-phosphate 5-kinase type-1 beta                        | 18719  |
| Pip5k1c | Phosphatidylinositol 4-phosphate 5-kinase type-1 gamma                       | 18717  |
| Pip5k2a | Phosphatidylinositol-4-phosphate 5-kinase type-2 alpha                       | 18718  |
| Pip5k2b | Phosphatidylinositol 5-phosphate 4-kinase type-2 beta                        | 108083 |
| Pip5k2c | Phosphatidylinositol 5-phosphate 4-kinase type-2 gamma                       | 117150 |
| Pip5k3  | Phosphatidylinositol-3-phosphate/phosphatidylinositol 5-kinase type III      | 18711  |
| Pip5kl1 | Phosphatidylinositol-4-phosphate 5-kinase-like 1                             | 227733 |
| Pkdcc   | Protein kinase domain-containing protein, cytoplasmic                        | 106522 |
| Pklr    | Pyruvate kinase                                                              | 18770  |
| Pkn1    | Protein kinase N1                                                            | 320795 |
| Pkn2    | Protein kinase N2                                                            | 109333 |

|         |                                                           |        |
|---------|-----------------------------------------------------------|--------|
| Pkn3    | Protein kinase N3                                         | 263803 |
| Plk1    | Polo-like kinase 1                                        | 18817  |
| Plk2    | Polo-like kinase 2                                        | 20620  |
| Plk3    | Polo-like kinase 3                                        | 12795  |
| Pmvk    | Phosphomevalonate kinase                                  | 68603  |
| Prkaa1  | 5'-AMP-activated protein kinase catalytic subunit alpha-1 | 105787 |
| Prkaa2  | 5'-AMP-activated protein kinase catalytic subunit alpha-2 | 108079 |
| Prkaca  | cAMP-dependent protein kinase catalytic subunit alpha     | 18747  |
| Prkacb  | cAMP-dependent protein kinase catalytic subunit beta      | 18749  |
| Prkca   | Protein kinase C alpha                                    | 18750  |
| Prkcb1  | Protein kinase C beta 1                                   | 18751  |
| Prkcc   | Protein kinase C gamma                                    | 18752  |
| Prkcd   | Protein kinase C delta                                    | 18753  |
| Prkce   | Protein kinase C epsilon                                  | 18754  |
| Prkch   | Protein kinase C eta                                      | 18755  |
| Prkci   | Protein kinase C iota                                     | 18759  |
| Prkcm   | Protein kinase C mu                                       | 18760  |
| Prkcn   | Protein kinase C nu                                       | 75292  |
| Prkcq   | Protein kinase C theta                                    | 18761  |
| Prkcz   | Protein kinase C zeta                                     | 18762  |
| Prkd2   | Protein kinase D2                                         | 101540 |
| Prkdc   | DNA-dependent protein kinase catalytic subunit            | 19090  |
| Prkg1   | cGMP-dependent protein kinase 1                           | 19091  |
| Prkg2   | cGMP-dependent protein kinase                             | 19092  |
| Prkx    | cAMP-dependent protein kinase catalytic subunit Prkx      | 19108  |
| Prpf4b  | PRP4 pre-mRNA processing factor 4 homolog B               | 19134  |
| Prps1   | Phosphoribosyl pyrophosphate synthetase 1                 | 19139  |
| Prps2   | Phosphoribosyl pyrophosphate synthetase 2                 | 110639 |
| Pskh1   | Serine/threonine-protein kinase H1                        | 244631 |
| Ptk2    | Focal adhesion kinase 1                                   | 14083  |
| Ptk2b   | PTK2 protein tyrosine kinase 2-beta                       | 19229  |
| Ptk6    | PTK6 protein tyrosine kinase 6                            | 20459  |
| Ptk7    | PTK7 protein tyrosine kinase 7                            | 71461  |
| Pxk     | PX domain-containing protein kinase                       | 218699 |
| Raf1    | Raf proto-oncogene serine/threonine-protein kinase        | 110157 |
| Rage    | Renal tumor antigen                                       | 26448  |
| Rbks    | Ribokinase                                                | 71336  |
| Ret     | Ret proto-oncogene                                        | 19713  |
| Riok1   | RIO kinase 1                                              | 71340  |
| Riok2   | RIO kinase 2                                              | 67045  |
| Riok3   | RIO kinase 3                                              | 66878  |
| Ripk1   | Receptor-interacting serine/threonine-protein kinase 1    | 19766  |
| Ripk2   | Receptor-interacting serine/threonine-protein kinase 2    | 192656 |
| Ripk3   | Receptor-interacting serine/threonine-protein kinase 3    | 56532  |
| Ripk4   | Receptor-interacting serine/threonine-protein kinase 4    | 72388  |
| Ripk5   | Receptor-interacting serine/threonine-protein kinase 5    | 213452 |
| Rnasel  | 2-5A-dependent ribonuclease                               | 24014  |
| Rock1   | Rho-associated coiled-coil forming kinase 1               | 19877  |
| Rock2   | Rho-associated coiled-coil forming kinase 2               | 19878  |
| Ror1    | Receptor tyrosine kinase-like orphan receptor 1           | 26563  |
| Ror2    | Receptor tyrosine kinase-like orphan receptor 2           | 26564  |
| Ros1    | Ros1 proto-oncogene                                       | 19886  |
| Rps6ka1 | Ribosomal protein S6 kinase                               | 20111  |
| Rps6ka2 | Ribosomal protein S6 kinase alpha-2                       | 20112  |
| Rps6ka3 | Ribosomal protein S6 kinase alpha-3                       | 110651 |
| Rps6ka4 | Ribosomal protein S6 kinase alpha-4                       | 56613  |
| Rps6ka5 | Ribosomal protein S6 kinase alpha-5                       | 73086  |
| Rps6ka6 | Ribosomal protein S6 kinase alpha-6                       | 67071  |
| Rps6kb2 | Ribosomal protein S6 kinase beta-2                        | 58988  |
| Rps6kc1 | Ribosomal protein S6 kinase delta-1                       | 320119 |



|         |                                                                                    |        |
|---------|------------------------------------------------------------------------------------|--------|
| Rps6k1  | Ribosomal protein S6 kinase-like 1                                                 | 238323 |
| Ryk     | Tyrosine-protein kinase Ryk                                                        | 20187  |
| Sbk1    | SH3-binding kinase 1                                                               | 104175 |
| Scap1   | Src kinase-associated phosphoprotein 1                                             | 78473  |
| Scap2   | Src kinase-associated phosphoprotein 2                                             | 54353  |
| Scyl1   | SCY1-like 1                                                                        | 78891  |
| Scyl2   | SCY1-like 2                                                                        | 213326 |
| Scyl3   | SCY1-like 3                                                                        | 240880 |
| Sephs2  | Selenophosphate synthetase 2                                                       | 20768  |
| Sgk     | Serum/glucocorticoid regulated kinase                                              | 20393  |
| Sgk071  | Probable inactive protein kinase-like protein Sgk071 homolog                       | 279029 |
| Sgk2    | Serum/glucocorticoid regulated kinase 2                                            | 27219  |
| Sgk223  | Tyrosine-protein kinase Sgk223                                                     | 244418 |
| Sgk3    | Serum/glucocorticoid regulated kinase 3                                            | 170755 |
| Sik3    | Serine/threonine-protein kinase Sik3                                               | 70661  |
| Slk     | STE20-like kinase                                                                  | 20874  |
| Smg1    | Serine/threonine-protein kinase Smg1                                               | 233789 |
| Snf1lk  | SNF1-like kinase                                                                   | 17691  |
| Snf1lk2 | SNF1-like kinase 2                                                                 | 235344 |
| Snrk    | SNF-related serine/threonine-protein kinase                                        | 20623  |
| Sphk1   | Sphingosine kinase 1                                                               | 20698  |
| Sphk2   | Sphingosine kinase 2                                                               | 56632  |
| Src     | Neuronal proto-oncogene tyrosine-protein kinase Src                                | 20779  |
| Srms    | Src-related kinase lacking C-terminal regulatory tyrosine and N-terminal myristyla | 20811  |
| Srpk1   | Serine/arginine-rich protein specific kinase 1                                     | 20815  |
| Srpk2   | Serine/arginine-rich protein specific kinase 2                                     | 20817  |
| Stk10   | Serine/threonine kinase 10                                                         | 20868  |
| Stk11   | Serine/threonine kinase 11                                                         | 20869  |
| Stk16   | Serine/threonine kinase 16                                                         | 20872  |
| Stk17b  | Serine/threonine kinase 17b                                                        | 98267  |
| Stk19   | Serine/threonine kinase 19                                                         | 54402  |
| Stk23   | Serine/threonine kinase 23                                                         | 56504  |
| Stk24   | Serine/threonine kinase 24                                                         | 223255 |
| Stk25   | Serine/threonine kinase 25                                                         | 59041  |
| Stk3    | Serine/threonine kinase 3                                                          | 56274  |
| Stk31   | Serine/threonine kinase 31                                                         | 77485  |
| Stk32b  | Serine/threonine kinase 32b                                                        | 64293  |
| Stk32c  | Serine/threonine kinase 32c                                                        | 57740  |
| Stk33   | Serine/threonine kinase 33                                                         | 117229 |
| Stk35   | Serine/threonine kinase 35                                                         | 67333  |
| Stk36   | Serine/threonine kinase 36                                                         | 269209 |
| Stk38   | Serine/threonine kinase 38                                                         | 106504 |
| Stk38l  | Serine/threonine kinase 38-like                                                    | 232533 |
| Stk39   | Serine/threonine kinase 39                                                         | 53416  |
| Stk4    | Serine/threonine kinase 4                                                          | 58231  |
| Stk40   | Serine/threonine kinase 40                                                         | 74178  |
| Strada  | STE20-related kinase adapter protein alpha                                         | 72149  |
| Stradb  | STE20-related kinase adapter protein beta                                          | 227154 |
| Styk1   | Serine/threonine/tyrosine kinase 1                                                 | 243659 |
| Syk     | Spleen tyrosine kinase                                                             | 20963  |
| Taf1    | Transcription initiation factor TFIID subunit 1                                    | 270627 |
| Taok1   | TAO kinase 1                                                                       | 216965 |
| Taok3   | Serine/threonine-protein kinase Tao3                                               | 330177 |
| Tbck    | TBC domain-containing protein kinase-like protein                                  | 271981 |
| Tbk1    | TANK-binding kinase 1                                                              | 56480  |
| Tec     | Tyrosine-protein kinase Tec                                                        | 21682  |
| Tek     | Endothelial-specific receptor tyrosine kinase                                      | 21687  |
| Tesk1   | Testis specific protein kinase 1                                                   | 21754  |
| Tesk2   | Testis-specific kinase 2                                                           | 230661 |
| Tex14   | Testis expressed gene 14                                                           | 83560  |

|        |                                                                  |        |
|--------|------------------------------------------------------------------|--------|
| Tgfr1  | TGF-beta receptor type-1                                         | 21812  |
| Tgfr2  | TGF-beta receptor type-2                                         | 21813  |
| Tie1   | Tyrosine kinase receptor 1                                       | 21846  |
| Tjp2   | Tight junction protein ZO-2                                      | 21873  |
| Tk2    | Thymidine kinase 2, mitochondrial                                | 57813  |
| Tlk1   | Tousled-like kinase 1                                            | 228012 |
| Tlk2   | Tousled-like kinase 2                                            | 24086  |
| Tnk    | TRAF2 and NCK interacting kinase                                 | 69014  |
| Tnk1   | Non-receptor tyrosine-protein kinase Tnk1                        | 83813  |
| Tnk2   | Activated CDC42 kinase 1                                         | 51789  |
| Tnni3k | TNNI3 interacting kinase                                         | 435766 |
| Tpk1   | Thiamin pyrophosphokinase                                        | 29807  |
| Trib1  | Tribbles homolog 1                                               | 211770 |
| Trib2  | Tribbles homolog 2                                               | 217410 |
| Trim27 | Tripartite motif protein 27                                      | 19720  |
| Trim28 | Tripartite motif protein 28                                      | 21849  |
| Trim33 | Tripartite motif protein 33                                      | 94093  |
| Trpm6  | Transient receptor potential cation channel subfamily M member 6 | 225997 |
| Trpm7  | Transient receptor potential cation channel subfamily M member 7 | 58800  |
| Tssk2  | Testis-specific serine kinase 2                                  | 22115  |
| Tssk3  | Testis-specific serine kinase 3                                  | 58864  |
| Tssk4  | Testis-specific serine kinase 4                                  | 71099  |
| Tssk6  | Testis-specific serine kinase 6                                  | 83984  |
| Ttk    | Ttk protein kinase                                               | 22137  |
| Ttn    | Titin                                                            | 22138  |
| Twf2   | Twinfilin-2                                                      | 23999  |
| Txk    | TXK tyrosine kinase                                              | 22165  |
| Tyk2   | Tyrosine kinase 2                                                | 54721  |
| Tyro3  | TYRO3 protein tyrosine kinase 3                                  | 22174  |
| Uck1   | Uridine-cytidine kinase 1                                        | 22245  |
| Uck2   | Uridine-cytidine kinase 2                                        | 80914  |
| Uckl1  | Uridine-cytidine kinase 1-like 1                                 | 68556  |
| Uhm1   | Serine/threonine-protein kinase Kist                             | 16589  |
| Ulk1   | Unc-51 like kinase 1                                             | 22241  |
| Ulk2   | Unc-51 like kinase 2                                             | 29869  |
| Vrk1   | Vaccinia related kinase 1                                        | 22367  |
| Vrk2   | Vaccinia related kinase 2                                        | 69922  |
| Vrk3   | Vaccinia related kinase 3                                        | 101568 |
| Wee1   | Wee1-like protein kinase                                         | 22390  |
| Wnk1   | WNK lysine deficient protein kinase 1                            | 232341 |
| Wnk2   | WNK lysine deficient protein kinase 2                            | 75607  |
| Wnk4   | WNK lysine deficient protein kinase 4                            | 69847  |
| Xylb   | Xylulokinase homolog                                             | 102448 |
| Yes1   | Tyrosine-protein kinase Yes                                      | 22612  |
| Zap70  | Tyrosine-protein kinase Zap70                                    | 22637  |
