# Supplementary figures and images for: Salt-inducible kinase 3 is a novel mitotic regulator and a target for enhancing antimitotic therapeutic-mediated cell death
Source: PubMed Central journal article supplement — Cell Death Dis. 2014 Apr 17;5(4):e1177–. doi: 10.1038/cddis.2014.154 (PMC4001308; doi:10.1038/cddis.2014.154), 2014-04-17

**A**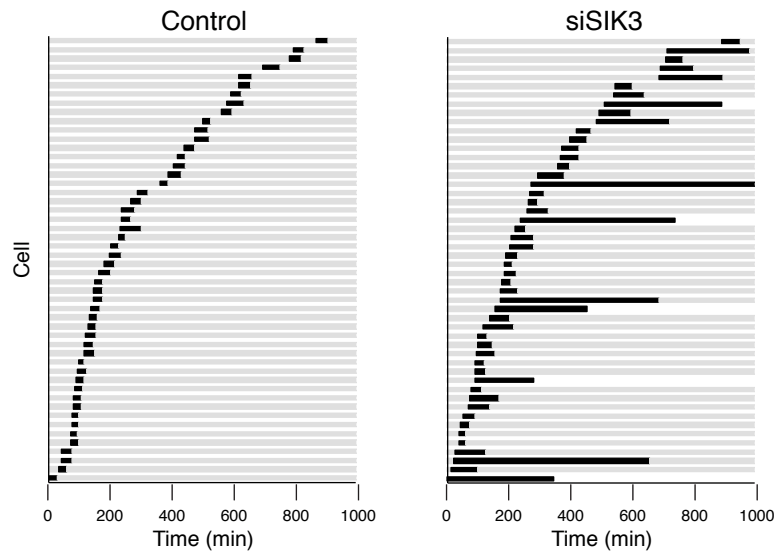**B**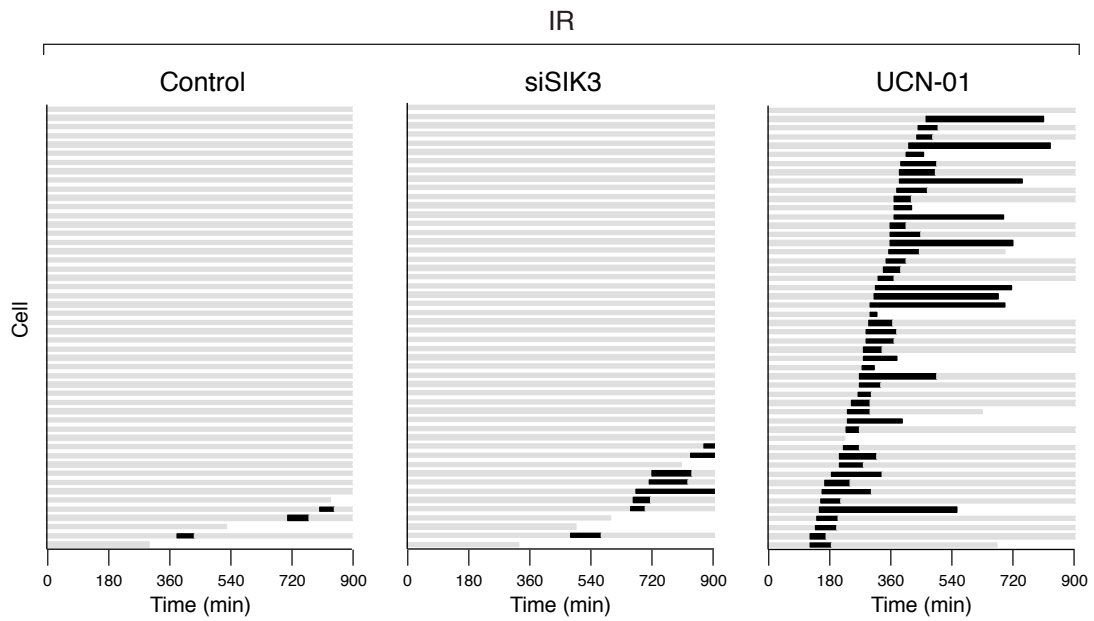

Figure S2

Supplement: cddis2014154x2.pdf [file cddis2014154x2.pdf]

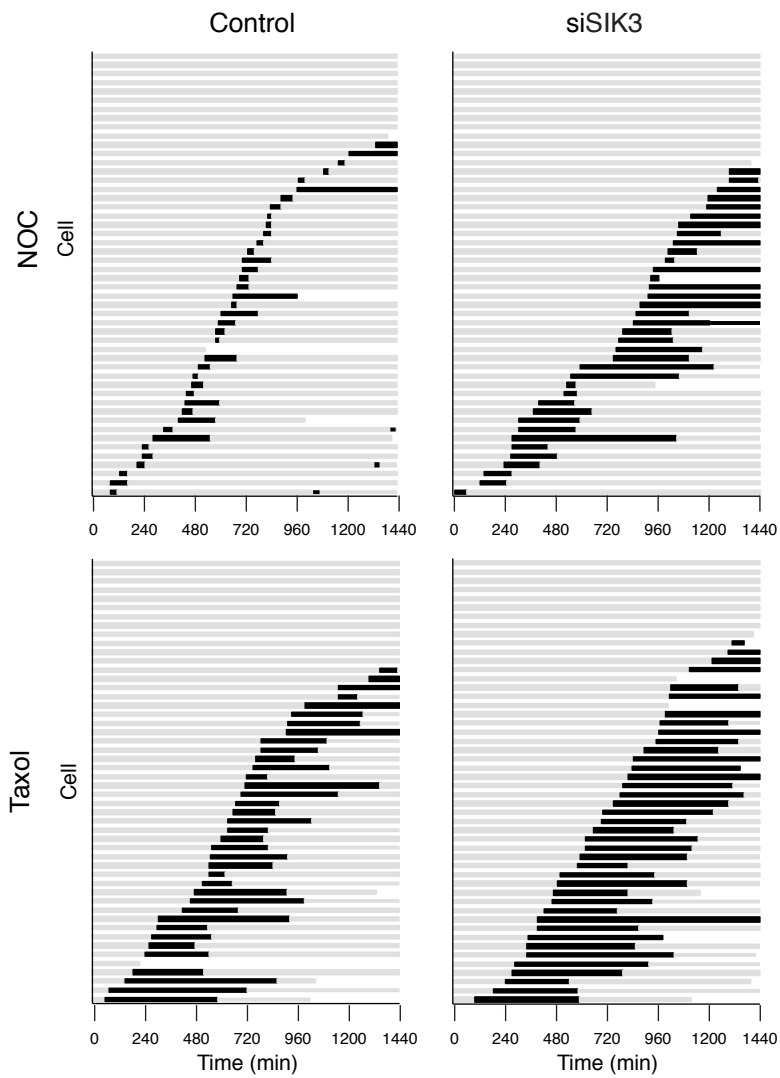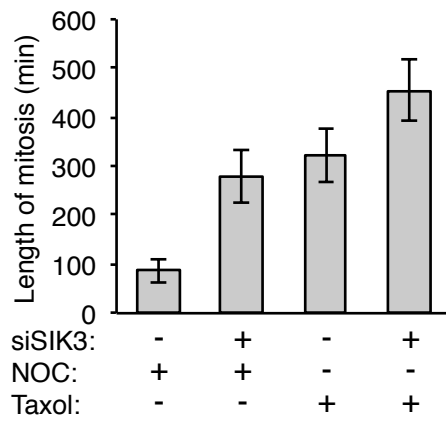

Figure S3

Supplement: cddis2014154x3.pdf [file cddis2014154x3.pdf]
